# Supplementary material for: Development and diagnostic validation of a one-step multiplex RT-PCR assay as a rapid method to detect and identify Nervous Necrosis Virus (NNV) and its variants circulating in the Mediterranean
Source: PubMed Central journal article supplement (PMC9417010; doi:10.1371/journal.pone.0273802), 2022-08-26
Supplement: pone.0273802.s001.pdf [file pone.0273802.s001.pdf]

|                | .... ....          | .... ....  | .... ....           | .... ....  | .... ....  |
|----------------|--------------------|------------|---------------------|------------|------------|
|                | 60                 | 70         | 80                  | 90         | 100        |
| 6/15           | TGCTAA <b>CAAT</b> | CGTCGGCGTA | GTAATCGCAC          | TGACGCACCC | GTGTTGACTG |
| 98/18B         | TGCTAA <b>CAAT</b> | CGTCGGCGTA | GTAATCGCAC          | TGACGCACCT | GTGTCAAAGG |
| 98/19A         | TGCTAA <b>CAAT</b> | CGTCGGCGTA | GTAATCGCAC          | TGACGCACCT | GTGTCAAAGG |
| 159/18A        | TGCTAA <b>CAAT</b> | CGTCGGCGTA | GTAATCGCAC          | TGACGCACCT | GTGTCAAAGG |
| 159/18B        | TGCTAA <b>CAAT</b> | CGTCGGCGTA | GTAATCGCAC          | TGACGCACCT | GTGTCAAAGG |
| 159/18C        | TGCTAA <b>CAAT</b> | CGTCGGCGTA | GTAATCGCAC          | TGACGCACCT | GTGTCAAAGG |
| 169/18         | TGCTAA <b>CAAT</b> | CGTCGGCGTA | GTAATCGCAC          | TGACGCACCT | GTGTCAAAGG |
| 173/18A        | TGCTAA <b>CAAT</b> | CGTCGGCGTA | GTAATCGCAC          | TGACGCACCT | GTGTCAAAGG |
| 173/18B        | TGCTAA <b>CAAT</b> | CGTCGGCGTA | GTAATCGCAC          | TGACGCACCT | GTGTCAAAGG |
| 285/16A        | TGCTAA <b>CAAT</b> | CGTCGGCGTA | GTAATCGCAC          | TGACGCACCC | GTGTCAAATG |
| <b>28/19B</b>  | TGCTAA <b>CAAT</b> | CGTCGGCGTA | GTA <b>ACC</b> GCAC | TGACGCACCT | GTGTCTAAGG |
| <b>125/18</b>  | TGCTAA <b>CAAT</b> | CGTCGGCGTA | GTA <b>ACC</b> GCAC | TGACGCACCT | GTGTCTAAGG |
| <b>523/18</b>  | TGCTAA <b>CAAT</b> | CGTCGGCGTA | GTA <b>ACC</b> GCAC | TGACGCACCT | GTGTCTAAGG |
| <b>257/17A</b> | TGCTAA <b>CAAT</b> | CGTCGGCGTA | GTA <b>ACC</b> GCAC | TGACGCACCT | GTGTCTAAGG |
| <b>740/20</b>  | TGCTAA <b>CAAT</b> | CGTCGGCGTA | GTA <b>ACC</b> GCAC | TGACGCACCT | GTGTCTAAGG |
| <b>837/20</b>  | TGCTAA <b>CAAT</b> | CGTCGGCGTA | GTA <b>ACC</b> GCAC | TGACGCACCT | GTGTCTAAGG |
| <b>257/17B</b> | TGCTAA <b>CAAT</b> | CGTCGGCGTA | GTA <b>ACC</b> GCAC | TGACGCACCT | GTGTCTAAGG |
| <b>385/17</b>  | TGCTAA <b>CAAT</b> | CGTCGGCGTA | GTA <b>ACC</b> GCAC | TGACGCACCT | GTGTCTAAGG |
| <b>386/17</b>  | TGCTAA <b>CAAT</b> | CGTCGGCGTA | GTA <b>ACC</b> GCAC | TGACGCACCT | GTGTCTAAGG |
| 534/18         | TGCTAA <b>CAAT</b> | CGTCGGCGTA | GTAATCGCAC          | TGACGCACCT | GTGTCAAAGG |
| 535/18         | TGCTAA <b>CAAT</b> | CGTCGGCGTA | GTAATCGCAC          | TGACGCACCT | GTGTCAAAGG |
| 537/18         | TGCTAA <b>CAAT</b> | CGTCGGCGTA | GTAATCGCAC          | TGACGCACCT | GTGTCAAAGG |
| RG_SPCF1b_RNA2 | -----CAAT          | CGTCGGCGTA | GTAATC-----         | -----      | -----      |
